# Supplementary material for: The value of supply chain coordination under moral hazard: A case study of the consumer product supply chain
Source: PLoS One. 2018 Mar 16;13(3):e0194043. doi: 10.1371/journal.pone.0194043 (PMC5856342; doi:10.1371/journal.pone.0194043)
Supplement: S1 File — (XLSX) [file pone.0194043.s001.xlsx]

## Sheet: NL3SPNCC
	Jan'14	Feb'14	Mar'14	Apr'14	May'14	Jun'14	Jul'14	Aug'14	Sep'14	Oct'14	Nov'14	Dec'14	Jan'15	Feb'15	Mar'15	Apr'15	May'15	Jun'15	Jul'15	Aug'15	Sep'15	Oct'15	Nov'15	Dec'15
On hand inventory	14581	14460	16246	16036	19941	16907	20885	18013	14529	18883	18250	15043	13889	14704	13960	16676	13540	12253
On order inventory	5667	7828	5308	8211	2875	8710	2393	1329	7279	1678	31	3916	4729	3557	6231	1523	4040	2436
Back order	453	626	425	657	230	697	191	106	582	134	2	313	378	285	498	122	323	195
Inventory level	14128	13834	15821	15379	19711	16210	20694	17907	13947	18749	18248	14730	13511	14419	13462	16554	13217	12058
Inventory position	19795	21662	21129	23590	22586	24920	23087	19236	21226	20427	18279	18646	18240	17976	19693	18077	17257	14494
Forecast	4106	5048	5334	6500	6000	5500	5500	5500	4911	4705	8053	8896	4458	4804	6785	6296	5126	3924	3728	4888	4692	4645	4399	4579
Sales	5347	6166	6408	5883	5396	6590	5253	5527	4947	3722	3570	3990	5296	4792	4588	4192	4901	6028	3989	3446	3313	3499	3577
Return	486	405	427	422	1123	701	561	286	183	833	1304	756	242	913	290	699	266	706
Forecast Error	1241	1118	1074	617	604	1090	247	27	36	983	4483	4906	838	12	2197	2104	225	2104
Forecast Error	0.232093	0.181317	0.167603	0.104878	0.111935	0.165402	0.0470208	0.00488511	0.00727714	0.264105	1.25574	1.22957	0.158233	0.00250417	0.478858	0.501908	0.045909	0.349038
Accuracy	0.767907	0.818683	0.832397	0.895122	0.888065	0.834598	0.952979	0.995115	0.992723	0.735895	-0.255742	-0.229574	0.841767	0.997496	0.521142	0.498092	0.954091	0.650962
	2.72695	2.34512	2.53527	2.72582	3.69552	2.56555	3.97582	3.25909	2.93693	5.07335	5.11204	3.77018
by new customer	998	1535	1753	962	342	1386	1026	1686	85	530	111	0
by exchange	210	128	1013	702	1814	447	907	134	800	342	452	0
	1208	1663	2766	1664	2156	1833	1933	1820	885	872	563	0
	0.225921	0.269705	0.431648	0.282849	0.399555	0.278149	0.36798	0.329293	0.178896	0.234283	0.157703	0	0.262998
	0.0908921	0.0656828	0.0666355	0.0717321	0.208117	0.106373	0.106796	0.051746	0.0369921	0.223804	0.365266	0.189474	0.0456949	0.190526	0.0632084	0.166746	0.0542746	0.11712	0.123393

## Sheet: Actual
	WK01	WK02	WK03	WK04	WK05	WK06	WK07	WK08	WK09	WK10	WK11	WK12	WK13	WK14	WK15	WK16	WK17	WK18	WK19	WK20	WK21	WK22	WK23	WK24	WK25	WK26	WK27	WK28	WK29	WK30	WK31	WK32	WK33	WK34	WK35	WK36	WK37	WK38	WK39	WK40	WK41	WK42	WK43	WK44	WK45	WK46	WK47	WK48	WK49
Inventory Position	16305	14538	13172	17210	16197	15289	16472	14487	13194	16901	14825	13596	17838	15839	14686	18554	17164	15396	18947	16990	15926	19741	18318	17069	19479	18217	15875	20070	19217	18529	18982	17462	16284	19484	18199	16814	19830	18730	18019	18633	17828	17090	18720	17592	16751	18938	18063	17378	18856
On Hand Inventory	13669	14538	13172	12796	11536	10618	13632	11770	10312	12179	9940	8727	12880	10881	9728	13862	12652	10668	14254	12407	11598	15399	13824	12605	15507	14539	11898	14801	13847	13204	16789	15196	13972	15525	14186	12799	15825	14725	14071	15916	15111	14464	16843	15336	14722	16134	15201	14789	16516
DC 출하량 (Shipments)	1767	1366	662	1013	908	1699	1985	1293	1210	2076	1229	716	1999	1153	860	1390	1768	1186	1957	1064	717	1423	1249	1598	1262	2342	1211	853	688	1859	1520	1178	847	1285	1385	989	1100	711	2103	805	738	685	1128	841	767	875	685	862	669
DC 주문량 (order quantity)			4700			2882			4917			4958			4728			4737			4532			4008			5406			2312			4047			4005			2717			2315			2954			2340
Back Order	0	0	0	0	0	0	0	0	0	0	0	0	0	0	0	0	0	0	0	0	0	0	0	0	0	0	0	0	0	0	0	0	0	0	0	0	0	0	0	0	0	0	0	0	0	0	0	0	0
Return	30	13	29	408	55	42	60	236	18	279	46	68	34	34	29	51	308	10	63	220	584	272	54	97	52	472	44	196	52	116	170	66	30	125	48	45	23	34	81	9	13	130	626	84	408	214	132	521	10
			122.2			74.932			127.842			128.908			122.928			123.162			117.832			104.208			140.556			60.112			105.222			104.13			70.642			60.19			76.804			60.84
			207.994			185.027			214.313			215.507			208.809			209.071			203.102			187.843			228.553			162.5			188.979			187.756			178.506			162.619			187.872			163.607
	Mean	1201.69	SSE	0.2155
	Std. Dev.	478.152					Demand Generation
		0	Forecasts	SE			RAND																		1767	979.311
	662	0.0172414	0.129512	0.0126048			0.684828	1431.8																	1366	1484.18
	669	0.0344828	0.132627	0.00963227			0.606726	1331.17																	662	519.949
	685	0.0517241	0.139938	0.00778172			0.5406	1250.44																	1013	1006.45
	685	0.0689655	0.139938	0.00503712			0.00127263	-241.329																	908	1046.75
	688	0.0862069	0.141339	0.00303955			0.753868	1530.04																	1699	590.962
	711	0.103448	0.152394	0.00239566			0.244766	871.261																	1985	1133.65
	716	0.12069	0.154871	0.00116836			0.328251	989.033																	1293	1083.59
	717	0.137931	0.155369	0.000304099			0.731114	1496.32																	1210	1168.51
	726	0.155172	0.159905	2.23932e-05			0.736836	1504.66																	2076	749.896
	738	0.172414	0.166085	4.00579e-05			0.656512	1394.37																	1229	1016.11
	750	0.189655	0.172417	0.000297154			0.248368	876.722																	716	684.726
	767	0.206897	0.181648	0.000637501			0.0348142	334.168																	1999	1558.44
	783	0.224138	0.190613	0.00112395			0.511526	1215.51																	1153	1503.56
	805	0.241379	0.203374	0.00144442			0.19809	795.995																	860	826.961
	841	0.258621	0.225322	0.00110879			0.0455096	393.591																	1390	1035.76
	845	0.275862	0.227841	0.00230601			0.949039	1983.76																	1768	942.277
	847	0.293103	0.229106	0.00409561			0.968242	2088.93																	1186	1400.82
	853	0.310345	0.232926	0.00599366			0.442013	1131.94																	1957	1832.13
	860	0.327586	0.237427	0.00812874			0.37883	1054.15																	1064	1256.74
	862	0.344828	0.238721	0.0112585			0.582131	1300.83																	717	1706.17
	875	0.362069	0.24723	0.0131881			0.167928	741.522																	1423	1790.78
	908	0.37931	0.269536	0.0120505			0.955369	2014.22																	1249	1911.14
	989	0.396552	0.328226	0.00466835			0.921374	1877.98																	1598	1345.48
	1013	0.413793	0.346561	0.0045202			0.303115	955.22																	1262
	1064	0.431034	0.386688	0.00196662																					2342
	1100	0.448276	0.415791	0.00105525																					1211
	1128	0.465517	0.43876	0.000715942																					853
	1153	0.482759	0.459446	0.000543465																					688
	1178	0.5	0.480243	0.000390347																					1859
	1186	0.517241	0.486912	0.000919883																					1520
	1203	0.534483	0.501093	0.00111486																					1178
	1210	0.551724	0.506933	0.00200622																					847
	1211	0.568966	0.507768	0.00374519																					1285
	1215	0.586207	0.511104	0.00564045																					1385
	1229	0.603448	0.522774	0.00650837																					989
	1249	0.62069	0.539409	0.00660659																					1100
	1262	0.637931	0.550186	0.00769913																					711
	1274	0.655172	0.560102	0.00903831																					2103
	1285	0.672414	0.569159	0.0106615																					805
	1293	0.689655	0.575724	0.0129804																					738
	1366	0.706897	0.63444	0.00524994																					685
	1385	0.724138	0.649278	0.00560398																					1128
	1390	0.741379	0.653147	0.00778503																					841
	1423	0.758621	0.678262	0.00645747																					767
	1519	0.775862	0.746533	0.000860217																					875
	1520	0.793103	0.747202	0.00210698																					685
	1598	0.810345	0.796402	0.000194407																					862
	1699	0.827586	0.850846	0.000541005																					669
	1707	0.844828	0.854698	9.74294e-05																					726
	1767	0.862069	0.881453	0.000375741																					845
	1768	0.87931	0.881867	6.5379e-06																					1203
	1859	0.896552	0.915386	0.000354732																					1215
	1957	0.913793	0.942906	0.000847554																					1707
	1985	0.931034	0.94931	0.000334008																					750
	1999	0.948276	0.952291	1.61197e-05																					783
	2076	0.965517	0.966264	5.57941e-07																					1519
	2103	0.982759	0.970284	0.000155611																					1274
	2342	1	0.991456	7.29923e-05																					979.311
																									1484.18
																									519.949
																									1006.45
																									1046.75
																									590.962
																									1133.65
																									1083.59
																									1168.51
																									749.896
																									1016.11
																									684.726
																									1558.44
																									1503.56
																									826.961
																									1035.76
																									942.277
																									1400.82
																									1832.13
																									1256.74
																									1706.17
																									1790.78
																									1911.14
																									1345.48
[truncated: 12 more columns]

## Sheet: SI0 (Base stock policy)
	WK01	WK02	WK03	WK04	WK05	WK06	WK07	WK08	WK09	WK10	WK11	WK12	WK13	WK14	WK15	WK16	WK17	WK18	WK19	WK20	WK21	WK22	WK23	WK24	WK25	WK26	WK27	WK28	WK29	WK30	WK31	WK32	WK33	WK34	WK35	WK36	WK37	WK38	WK39	WK40	WK41	WK42	WK43	WK44	WK45	WK46	WK47	WK48	WK49
Inventory Position	16305	14538	13172	12510	11603	10695	8996	9232	13038	12305	10989	12445	12951	12107	12464	12643	11947	10179	11102	9774	12732	12201	11699	10450	8852	9360	8115	14400	14596	14962	13103	11583	12366	11701	10416	9031	8879	8445	8420	6317	13316	13213	13257	12129	11288	10521	9646	8961	8099
On Hand Inventory	13669	14538	13172	12510	11783	10628	8919	7053	5883	4508	4848	8555	8332	7045	8577	8939	8740	8662	8299	7080	6126	7773	6760	9381	7999	7626	5578	4068	5091	5399	11081	10648	10451	9558	8361	8883	8074	6942	6231	5022	4826	4774	4180	11203	10618	10807	9796	9053	8464
DC 출하량 (Shipments)	1767	1366	662	1013	908	1699	1985	1293	1210	2076	1229	716	1999	1153	860	1390	1768	1186	1957	1064	717	1423	1249	1598	1262	2342	1211	853	688	1859	1520	1178	847	1285	1385	989	1100	711	2103	805	738	685	1128	841	767	875	685	862	669
DC 주문량 (Order quantity) 2)	0	0	0	106	0	0	2221	5099	477	760	2685	1222	1155	1510	1039	694	0	2109	629	4022	186	921	0	0	1770	1097	7496	1049	1054	0	0	1961	182	0	0	837	666	686	0	7804	635	729	0	0	0	0	0	0	0
Back Order	0	0	0	0	0	0	0	0	0	0	0	0	0	0	0	0	0	0	0	0	0	0	0	0	0	0	0	0	0	0	0	0	0	0	0	0	0	0	0	0	0	0	0	0	0	0	0	0	0
AVG D	11486	11486	10183	8223	6589	5597	7844	9950	10784	9724	9922	9783	8713	8546	8381	8693	7374	8706	9412	10641	9116	8099	6942	7343	9252	8903	11271	10433	9547	5963	7367	8812	9874	7681	7172	7621	7928	7527	6067	8481	7842	7900	4828	5528	5751	5928	5380	5042	5248
SS		2227	2227	4393	2764	1415	3373	4381	2731	3341	3752	3884	5393	5071	5122	4644	2085	3582	2319	3155	3802	5023	2772	2888	1370	1554	4340	5016	6103	2100	4977	4732	2674	2642	1793	2247	1617	1604	1574	5640	6109	6042	472	1900	1764	1497	434	748	833
Base Stock	11486	13713	12410	12616	9353	7012	11217	14331	13515	13065	13674	13667	14106	13617	13503	13337	9459	12288	11731	13796	12918	13122	9714	10231	10622	10457	15611	15449	15650	8063	12344	13544	12548	10323	8965	9868	9545	9131	7641	14121	13951	13942	5300	7428	7515	7425	5814	5790	6081
Return	30	13	29	408	55	42	60	236	18	279	46	68	34	34	29	51	308	10	63	220	584	272	54	97	52	472	44	196	52	116	170	66	30	125	48	45	23	34	81	9	13	130	626	84	408	214	132	521	10
	0	0	0	2.756	0	0	57.746	132.574	12.402	19.76	69.81	31.772	30.03	39.26	27.014	18.044	0	54.834	16.354	104.572	4.836	23.946	0	0	46.02	28.522	194.896	27.274	27.404	0	0	50.986	4.732	0	0	21.762	17.316	17.836	0	202.904	16.51	18.954	0	0	0	0	0	0	0
[truncated: 12 more columns]

## Sheet: SI1 (Avg. demand based order)
	WK01	WK02	WK03	WK04	WK05	WK06	WK07	WK08	WK09	WK10	WK11	WK12	WK13	WK14	WK15	WK16	WK17	WK18	WK19	WK20	WK21	WK22	WK23	WK24	WK25	WK26	WK27	WK28	WK29	WK30	WK31	WK32	WK33	WK34	WK35	WK36	WK37	WK38	WK39	WK40	WK41	WK42	WK43	WK44	WK45	WK46	WK47	WK48	WK49
Inventory Position	16305	16305	16506	17109	17110	17063	16571	16117	16483	16769	16220	16496	17121	16437	16574	17052	16797	16369	16631	16311	16650	17179	16824	16705	16531	16639	16031	16425	17041	17271	16546	16382	16723	17058	16877	16665	16896	16954	17177	16379	16781	17259	17317	17040	17084	17229	17182	17273	17219
On Hand Inventory	13669	11004	13172	12510	13550	13962	13518	12560	12251	12083	11733	12000	12796	12276	12628	13109	13070	12772	12708	11930	12316	13302	13297	13299	12977	12751	11833	11747	12370	13315	13106	13093	12760	13001	13160	13240	13431	13403	13865	13039	13335	13531	14242	14668	14664	14867	14707	14849	15172
DC 출하량 (Shipments)	1767	1366	662	1013	908	1699	1985	1293	1210	2076	1229	716	1999	1153	860	1390	1768	1186	1957	1064	717	1423	1249	1598	1262	2342	1211	853	688	1859	1520	1178	847	1285	1385	989	1100	711	2103	805	738	685	1128	841	767	875	685	862	669
DC 주문량 (Order quantity) 2)	1767	1567	1265	1014	861	1207	1531	1659	1496	1527	1505	1341	1315	1290	1338	1135	1340	1448	1637	1403	1246	1068	1130	1424	1370	1734	1605	1469	918	1134	1356	1519	1182	1104	1173	1220	1158	934	1305	1207	1216	743	851	885	912	828	776	808	739
Back Order	0	0	0	0	0	0	0	0	0	0	0	0	0	0	0	0	0	0	0	0	0	0	0	0	0	0	0	0	0	0	0	0	0	0	0	0	0	0	0	0	0	0	0	0	0	0	0	0	0
AVG D	11486	11486	10183	8223	6589	5597	7844	9950	10784	9724	9922	9783	8713	8546	8381	8693	7374	8706	9412	10641	9116	8099	6942	7343	9252	8903	11271	10433	9547	5963	7367	8812	9874	7681	7172	7621	7928	7527	6067	8481	7842	7900	4828	5528	5751	5928	5380	5042	5248
SS		2227	2227	4393	2764	1415	3373	4381	2731	3341	3752	3884	5393	5071	5122	4644	2085	3582	2319	3155	3802	5023	2772	2888	1370	1554	4340	5016	6103	2100	4977	4732	2674	2642	1793	2247	1617	1604	1574	5640	6109	6042	472	1900	1764	1497	434	748	833
Base Stock	11486	13713	12410	12616	9353	7012	11217	14331	13515	13065	13674	13667	14106	13617	13503	13337	9459	12288	11731	13796	12918	13122	9714	10231	10622	10457	15611	15449	15650	8063	12344	13544	12548	10323	8965	9868	9545	9131	7641	14121	13951	13942	5300	7428	7515	7425	5814	5790	6081
Return	30	13	29	408	55	42	60	236	18	279	46	68	34	34	29	51	308	10	63	220	584	272	54	97	52	472	44	196	52	116	170	66	30	125	48	45	23	34	81	9	13	130	626	84	408	214	132	521	10
[truncated: 12 more columns]

## Sheet: Graph
	WK01	WK02	WK03	WK04	WK05	WK06	WK07	WK08	WK09	WK10	WK11	WK12	WK13	WK14	WK15	WK16	WK17	WK18	WK19	WK20	WK21	WK22	WK23	WK24	WK25	WK26	WK27	WK28	WK29	WK30	WK31	WK32	WK33	WK34	WK35	WK36	WK37	WK38	WK39	WK40	WK41	WK42	WK43	WK44	WK45	WK46	WK47	WK48	WK49
Inventory Position (Actual)	16305	14538	13172	17210	16197	15289	16472	14487	13194	16901	14825	13596	17838	15839	14686	18554	17164	15396	18947	16990	15926	19741	18318	17069	19479	18217	15875	20070	19217	18529	18982	17462	16284	19484	18199	16814	19830	18730	18019	18633	17828	17090	18720	17592	16751	18938	18063	17378	18856
Inventory Position (Base Stock Policy)	16305	14538	13172	12510	11603	10695	8996	9232	13038	12305	10989	12445	12951	12107	12464	12643	11947	10179	11102	9774	12732	12201	11699	10450	8852	9360	8115	14400	14596	14962	13103	11583	12366	11701	10416	9031	8879	8445	8420	6317	13316	13213	13257	12129	11288	10521	9646	8961	8099
Inventory Position (Average Demand)	16305	16305	16506	17109	17110	17063	16571	16117	16483	16769	16220	16496	17121	16437	16574	17052	16797	16369	16631	16311	16650	17179	16824	16705	16531	16639	16031	16425	17041	17271	16546	16382	16723	17058	16877	16665	16896	16954	17177	16379	16781	17259	17317	17040	17084	17229	17182	17273	17219
[truncated: 9 more columns]

## Sheet: VMI (retailer A)
Retailer A	JAN	JAN	JAN	JAN	JAN	JAN	JAN	JAN	JAN	JAN	JAN	JAN	JAN	JAN	JAN	JAN	JAN	JAN	JAN	JAN	JAN	JAN	JAN	JAN	JAN	JAN	JAN	JAN	JAN	JAN	FEB	FEB	FEB	FEB	FEB	FEB	FEB	FEB	FEB	FEB	FEB	FEB	FEB	FEB	FEB	FEB	FEB	FEB	FEB
	SUN	MON	TUE	WED	THU	FRI	SAT	SUN	MON	TUE	WED	THU	FRI	SAT	SUN	MON	TUE	WED	THU	FRI	SAT	SUN	MON	TUE	WED	THU	FRI	SAT	SUN	MON	TUE	WED	THU	FRI	SAT	SUN	MON	TUE	WED	THU	FRI	SAT	SUN	MON	TUE	WED	THU	FRI	SAT
104076	1	2	3	4	5	6	7	8	9	10	11	12	13	14	15	16	17	18	19	20	21	22	23	24	25	26	27	28	29	30	31	1	2	3	4	5	6	7	8	9	10	11	12	13	14	15	16	17	18
Inventory Position	0	0	34	43	43	41	41	41	41	41	39	39	33	33	33	33	33	33	33	29	29	29	29	29	29	22	29	29	29	29	29	27	23	21	21	19	19	16	16	14	14	14	14	14	8	25	25	21	21
On Hand Inventory	0	-45	23	43	43	41	41	41	41	41	39	39	33	33	33	33	33	33	33	29	29	29	29	29	29	15	29	29	29	29	29	27	23	21	21	19	19	16	16	14	14	14	14	14	-9	25	25	21	21
Demand	0	11	2	0	2	0	0	0	0	2	0	6	0	0	0	0	0	0	4	0	0	0	0	0	7	0	0	0	0	0	2	4	2	0	2	0	3	0	2	0	0	0	0	6	0	0	4	0	6
RE 주문량 (reorder quantity)	0	45	11	0	0	0	0	0	0	0	0	0	0	0	0	0	0	0	0	0	0	0	0	0	0	7	0	0	0	0	0	0	0	0	0	0	0	0	0	0	0	0	0	0	17	0	0	0	0
Back Order	0	56	0	0	0	0	0	0	0	0	0	0	0	0	0	0	0	0	0	0	0	0	0	0	0	0	0	0	0	0	0	0	0	0	0	0	0	0	0	0	0	0	0	0	9	0	0	0	0
AVG D	0	11	11	13	2	2	2	0	0	0	2	2	6	6	0	0	0	0	0	4	4	0	0	0	0	7	7	0	0	0	0	2	6	6	2	2	2	3	3	2	2	0	0	0	6	6	0	4	4
SS	0	34	34	28	7	7	7	0	0	0	7	7	19	19	0	0	0	0	0	13	13	0	0	0	0	22	22	0	0	0	0	7	7	7	7	7	7	10	10	7	7	0	0	0	19	19	0	13	13
Base Stock	0	45	45	41	9	9	9	0	0	0	9	9	25	25	0	0	0	0	0	17	17	0	0	0	0	29	29	0	0	0	0	9	13	13	9	9	9	13	13	9	9	0	0	0	25	25	0	17	17
																																									121
	0	1	0	0	0	0	0	0	0	0	0	0	0	0	0	0	0	0	0	0	0	0	0	0	0	0	0	0	0	0	0	0	0	0	0	0	0	0	0	0	0	0	0	0	0	0	0	0	0
	0	1	1	0	0	0	0	0	0	0	0	0	0	0	0	0	0	0	0	0	0	0	0	0	0	1	0	0	0	0	0	0	0	0	0	0	0	0	0	0	0	0	0	0	1	0	0	0	0
8644	0	509064	0	0	0	0	0	0	0	0	0	0	0	0	0	0	0	0	0	0	0	0	0	0	0	0	0	0	0	0	0	0	0	0	0	0	0	0	0	0	0	0	0	0	102796	0	0	0	0
EXPEDITE	0	25000	0	0	0	0	0	0	0	0	0	0	0	0	0	0	0	0	0	0	0	0	0	0	0	0	0	0	0	0	0	0	0	0	0	0	0	0	0	0	0	0	0	0	25000	0	0	0	0
원래 주문량 (actual order quantity)	0	11	2	0	2	0	0	0	0	2	0	6	0	0	0	0	0	0	4	0	0	0	0	0	7	0	0	0	0	0	2	4	2	0	2	0	3	0	2	0	121	0	0	6	0	0	4	0	6
[truncated: 326 more columns]

## Sheet: VMI (retailer B)
Retailer B	JAN	JAN	JAN	JAN	JAN	JAN	JAN	JAN	JAN	JAN	JAN	JAN	JAN	JAN	JAN	JAN	JAN	JAN	JAN	JAN	JAN	JAN	JAN	JAN	JAN	JAN	JAN	JAN	JAN	JAN	FEB	FEB	FEB	FEB	FEB	FEB	FEB	FEB	FEB	FEB	FEB	FEB	FEB	FEB	FEB	FEB	FEB	FEB	FEB
	SUN	MON	TUE	WED	THU	FRI	SAT	SUN	MON	TUE	WED	THU	FRI	SAT	SUN	MON	TUE	WED	THU	FRI	SAT	SUN	MON	TUE	WED	THU	FRI	SAT	SUN	MON	TUE	WED	THU	FRI	SAT	SUN	MON	TUE	WED	THU	FRI	SAT	SUN	MON	TUE	WED	THU	FRI	SAT
117085	1	2	3	4	5	6	7	8	9	10	11	12	13	14	15	16	17	18	19	20	21	22	23	24	25	26	27	28	29	30	31	1	2	3	4	5	6	7	8	9	10	11	12	13	14	15	16	17	18
Inventory Position	0	0	0	0	0	0	0	0	0	0	0	0	0	0	0	0	0	0	0	0	0	0	0	0	0	-6	25	25	23	23	14	37	37	37	37	37	37	33	33	31	31	31	31	31	23	23	19	27	27
On Hand Inventory	0	0	0	0	0	0	0	0	0	0	0	0	0	0	0	0	0	0	0	0	0	0	0	0	0	-37	25	25	23	23	-9	37	37	37	37	37	37	33	33	31	31	31	31	31	13	21	9	27	27
Demand	0	0	0	0	0	0	0	0	0	0	0	0	0	0	0	0	0	0	0	0	0	0	0	0	6	0	0	2	0	9	0	0	0	0	0	0	4	0	2	0	0	0	0	8	10	6	2	0	0
RE 주문량 (reorder quantity)	0	0	0	0	0	0	0	0	0	0	0	0	0	0	0	0	0	0	0	0	0	0	0	0	0	31	0	0	0	0	23	0	0	0	0	0	0	0	0	0	0	0	0	0	10	2	10	0	0
Back Order	0	0	0	0	0	0	0	0	0	0	0	0	0	0	0	0	0	0	0	0	0	0	0	0	6	37	0	0	0	0	9	0	0	0	0	0	0	0	0	0	0	0	0	0	0	0	0	0	0
AVG D	0	0	0	0	0	0	0	0	0	0	0	0	0	0	0	0	0	0	0	0	0	0	0	0	0	6	6	0	2	2	9	9	0	0	0	0	0	4	4	2	2	0	0	0	8	18	16	8	2
SS	0	0	0	0	0	0	0	0	0	0	0	0	0	0	0	0	0	0	0	0	0	0	0	0	0	19	19	0	7	7	28	28	0	0	0	0	0	13	13	7	7	0	0	0	25	7	13	13	7
Base Stock	0	0	0	0	0	0	0	0	0	0	0	0	0	0	0	0	0	0	0	0	0	0	0	0	0	25	25	0	9	9	37	37	0	0	0	0	0	17	17	9	9	0	0	0	33	25	29	21	9
												314
	0	0	0	0	0	0	0	0	0	0	0	0	0	0	0	0	0	0	0	0	0	0	0	0	0	0	0	0	0	0	0	0	0	0	0	0	0	0	0	0	0	0	0	0	0	0	0	0	0
	0	0	0	0	0	0	0	0	0	0	0	0	0	0	0	0	0	0	0	0	0	0	0	0	0	1	0	0	0	0	1	0	0	0	0	0	0	0	0	0	0	0	0	0	1	1	1	0	0
8644	0	0	0	0	0	0	0	0	0	0	0	0	0	0	0	0	0	0	0	0	0	0	0	0	76864	344828	0	0	0	0	102796	0	0	0	0	0	0	0	0	0	0	0	0	0	0	0	0	0	0
EXPEDITE	0	0	0	0	0	0	0	0	0	0	0	0	0	0	0	0	0	0	0	0	0	0	0	0	25000	25000	0	0	0	0	25000	0	0	0	0	0	0	0	0	0	0	0	0	0	0	0	0	0	0
원래 주문량 (actual order quantity)	0	0	0	0	0	0	0	0	0	0	0	314	0	0	0	0	0	0	0	0	0	0	0	0	6	0	0	2	0	9	0	0	0	0	0	0	4	0	2	0	0	0	0	8	10	6	2	0	0
[truncated: 326 more columns]

## Sheet: VMI (retailer C)
Retailer C	JAN	JAN	JAN	JAN	JAN	JAN	JAN	JAN	JAN	JAN	JAN	JAN	JAN	JAN	JAN	JAN	JAN	JAN	JAN	JAN	JAN	JAN	JAN	JAN	JAN	JAN	JAN	JAN	JAN	JAN	FEB	FEB	FEB	FEB	FEB	FEB	FEB	FEB	FEB	FEB	FEB	FEB	FEB	FEB	FEB	FEB	FEB	FEB	FEB
	SUN	MON	TUE	WED	THU	FRI	SAT	SUN	MON	TUE	WED	THU	FRI	SAT	SUN	MON	TUE	WED	THU	FRI	SAT	SUN	MON	TUE	WED	THU	FRI	SAT	SUN	MON	TUE	WED	THU	FRI	SAT	SUN	MON	TUE	WED	THU	FRI	SAT	SUN	MON	TUE	WED	THU	FRI	SAT
118032	1	2	3	4	5	6	7	8	9	10	11	12	13	14	15	16	17	18	19	20	21	22	23	24	25	26	27	28	29	30	31	1	2	3	4	5	6	7	8	9	10	11	12	13	14	15	16	17	18
Inventory Position	0	0	0	0	0	0	-6	25	25	25	25	25	25	25	25	25	25	25	25	25	25	25	25	25	25	25	25	25	25	24	24	24	24	24	24	24	24	24	24	24	24	24	24	24	24	23	23	23	23
On Hand Inventory	0	0	0	0	0	0	-37	25	25	25	25	25	25	25	25	25	25	25	25	25	25	25	25	25	25	25	25	25	25	24	24	24	24	24	24	24	24	24	24	24	24	24	24	24	24	23	23	23	23
Demand	0	0	0	0	0	6	0	0	0	0	0	0	0	0	0	0	0	0	0	0	0	0	0	0	0	0	0	0	1	0	0	0	0	0	0	0	0	0	0	0	0	0	0	0	1	0	0	0	0
RE 주문량 (reorder quantity)	0	0	0	0	0	0	31	0	0	0	0	0	0	0	0	0	0	0	0	0	0	0	0	0	0	0	0	0	0	0	0	0	0	0	0	0	0	0	0	0	0	0	0	0	0	0	0	0	0
Back Order	0	0	0	0	0	6	37	0	0	0	0	0	0	0	0	0	0	0	0	0	0	0	0	0	0	0	0	0	0	0	0	0	0	0	0	0	0	0	0	0	0	0	0	0	0	0	0	0	0
AVG D	0	0	0	0	0	0	6	6	0	0	0	0	0	0	0	0	0	0	0	0	0	0	0	0	0	0	0	0	0	1	1	0	0	0	0	0	0	0	0	0	0	0	0	0	0	1	1	0	0
SS	0	0	0	0	0	0	19	19	0	0	0	0	0	0	0	0	0	0	0	0	0	0	0	0	0	0	0	0	0	4	4	0	0	0	0	0	0	0	0	0	0	0	0	0	0	4	4	0	0
Base Stock	0	0	0	0	0	0	25	25	0	0	0	0	0	0	0	0	0	0	0	0	0	0	0	0	0	0	0	0	0	5	5	0	0	0	0	0	0	0	0	0	0	0	0	0	0	5	5	0	0
	0	0	0	0	0	0	0	0	0	0	0	0	0	0	0	0	0	0	0	0	0	0	0	0	0	0	0	0	0	0	0	0	0	0	0	0	0	0	0	0	0	0	0	0	0	0	0	0	0
	0	0	0	0	0	0	1	0	0	0	0	0	0	0	0	0	0	0	0	0	0	0	0	0	0	0	0	0	0	0	0	0	0	0	0	0	0	0	0	0	0	0	0	0	0	0	0	0	0
8644	0	0	0	0	0	76864	344828	0	0	0	0	0	0	0	0	0	0	0	0	0	0	0	0	0	0	0	0	0	0	0	0	0	0	0	0	0	0	0	0	0	0	0	0	0	0	0	0	0	0
EXPEDITE	0	0	0	0	0	25000	25000	0	0	0	0	0	0	0	0	0	0	0	0	0	0	0	0	0	0	0	0	0	0	0	0	0	0	0	0	0	0	0	0	0	0	0	0	0	0	0	0	0	0
원래 주문량 (actual order quantity)	0	0	0	0	0	6	0	0	0	0	0	0	0	0	0	0	0	0	0	0	0	0	0	0	0	0	0	0	1	0	0	0	0	0	0	0	0	0	0	0	0	0	0	0	1	0	0	0	0
[truncated: 326 more columns]

## Sheet: VMI (retailer D)
Retailer D	JAN	JAN	JAN	JAN	JAN	JAN	JAN	JAN	JAN	JAN	JAN	JAN	JAN	JAN	JAN	JAN	JAN	JAN	JAN	JAN	JAN	JAN	JAN	JAN	JAN	JAN	JAN	JAN	JAN	JAN	FEB	FEB	FEB	FEB	FEB	FEB	FEB	FEB	FEB	FEB	FEB	FEB	FEB	FEB	FEB	FEB	FEB	FEB	FEB
	SUN	MON	TUE	WED	THU	FRI	SAT	SUN	MON	TUE	WED	THU	FRI	SAT	SUN	MON	TUE	WED	THU	FRI	SAT	SUN	MON	TUE	WED	THU	FRI	SAT	SUN	MON	TUE	WED	THU	FRI	SAT	SUN	MON	TUE	WED	THU	FRI	SAT	SUN	MON	TUE	WED	THU	FRI	SAT
443005	1	2	3	4	5	6	7	8	9	10	11	12	13	14	15	16	17	18	19	20	21	22	23	24	25	26	27	28	29	30	31	1	2	3	4	5	6	7	8	9	10	11	12	13	14	15	16	17	18
Inventory Position	0	0	7	9	9	9	9	9	9	9	9	-3	49	49	49	49	49	49	49	47	45	43	43	43	43	39	39	37	37	37	27	41	41	41	41	41	41	41	39	39	39	39	37	37	35	33	33	31	31
On Hand Inventory	0	-9	5	9	9	9	9	9	9	9	9	-55	49	49	49	49	49	49	49	47	45	43	43	43	43	39	39	37	37	37	13	41	41	41	41	41	41	41	39	39	39	39	37	37	35	33	33	31	31
Demand	0	2	0	0	0	0	0	0	0	0	12	0	0	0	0	0	0	0	2	2	2	0	0	0	4	0	2	0	0	10	0	0	0	0	0	0	0	2	0	0	0	2	0	2	2	0	2	0	0
RE 주문량 (reorder quantity)	0	9	2	0	0	0	0	0	0	0	0	52	0	0	0	0	0	0	0	0	0	0	0	0	0	0	0	0	0	0	14	0	0	0	0	0	0	0	0	0	0	0	0	0	0	0	0	0	0
Back Order	0	11	0	0	0	0	0	0	0	0	3	55	0	0	0	0	0	0	0	0	0	0	0	0	0	0	0	0	0	0	0	0	0	0	0	0	0	0	0	0	0	0	0	0	0	0	0	0	0
AVG D	0	2	2	2	0	0	0	0	0	0	0	12	12	0	0	0	0	0	0	2	4	4	2	0	0	4	4	2	2	0	10	10	0	0	0	0	0	0	2	2	0	0	2	2	2	4	2	2	2
SS	0	7	7	7	0	0	0	0	0	0	0	37	37	0	0	0	0	0	0	7	0	0	7	0	0	13	13	7	7	0	31	31	0	0	0	0	0	0	7	7	0	0	7	7	7	0	7	7	7
Base Stock	0	9	9	9	0	0	0	0	0	0	0	49	49	0	0	0	0	0	0	9	4	4	9	0	0	17	17	9	9	0	41	41	0	0	0	0	0	0	9	9	0	0	9	9	9	4	9	9	9
	0	0	0	0	0	0	0	0	0	0	2	0	0	0	0	0	0	0	0	0	0	0	0	0	0	0	0	0	0	0	0	0	0	0	0	0	0	0	0	0	0	0	0	0	0	0	0	0	0
	0	1	1	0	0	0	0	0	0	0	0	1	0	0	0	0	0	0	0	0	0	0	0	0	0	0	0	0	0	0	1	0	0	0	0	0	0	0	0	0	0	0	0	0	0	0	0	0	0
8644	0	120084	0	0	0	0	0	0	0	0	50932	500420	0	0	0	0	0	0	0	0	0	0	0	0	0	0	0	0	0	0	0	0	0	0	0	0	0	0	0	0	0	0	0	0	0	0	0	0	0
EXPEDITE	0	25000	0	0	0	0	0	0	0	0	25000	25000	0	0	0	0	0	0	0	0	0	0	0	0	0	0	0	0	0	0	0	0	0	0	0	0	0	0	0	0	0	0	0	0	0	0	0	0	0
원래 주문량 (actual order quantity)	0	2	0	0	0	0	0	0	0	0	12	0	0	0	0	0	0	0	2	2	2	0	0	0	4	0	2	0	0	10	0	0	0	0	0	0	0	2	0	0	0	2	0	2	2	0	2	0	0
[truncated: 326 more columns]

## Sheet: Sheet3
On hand inventory	WK01	WK02	WK03	WK04	WK05	WK06	WK07	WK08	WK09	WK10	WK11	WK12	WK13	WK14	WK15	WK16	WK17	WK18	WK19	WK20	WK21	WK22	WK23	WK24	WK25	WK26	WK27	WK28	WK29	WK30	WK31	WK32	WK33	WK34	WK35	WK36	WK37	WK38	WK39	WK40	WK41	WK42	WK43	WK44	WK45	WK46	WK47	WK48	WK49
Service Rate 99.9%	13669	14538	13172	12510	11783	10628	8919	7053	5883	4508	4848	8555	8332	7045	8577	8939	8740	8662	8299	7080	6126	7773	6760	9381	7999	7626	5578	4068	5091	5399	11081	10648	10451	9558	8361	8883	8074	6942	6231	5022	4826	4774	4180	11203	10618	10807	9796	9053	8464
Service Rate 97.0%	13669	14538	13172	12510	11783	10628	8919	6947	5777	4402	3534	6848	7268	5744	7115	7426	6639	6686	6303	5271	4317	6377	5856	8152	6584	5669	3621	2724	4557	4793	9390	8694	8073	7180	5983	7039	7032	5900	5189	4147	4196	4149	3555	9005	8238	8453	7442	6699	6110
Service Rate 95.0%	13669	14538	13172	12510	11783	10628	8919	6947	5777	4402	3282	6521	7064	5494	6835	7136	6236	6308	5921	4924	3970	6110	5683	7916	6348	5294	3246	2508	4455	4677	9066	8319	7618	6725	5528	6686	6832	5700	4989	3979	4075	4029	3435	8584	7782	8002	6991	6248	5659
Service Rate 93.0%	13669	14538	13172	12510	11783	10628	8919	6947	5777	4402	3096	6279	6913	5310	6628	6921	5938	6028	5638	4668	3714	5912	5555	7742	6174	5017	2969	2349	4379	4592	8826	8042	7281	6388	5191	6425	6685	5553	4842	3855	3986	3941	3347	8273	7444	7668	6657	5914	5325
Service Rate 91.0%	13669	14538	13172	12510	11783	10628	8919	6947	5777	4402	2943	6080	6789	5158	6457	6745	5693	5797	5405	4457	3503	5749	5450	7599	6031	4789	2741	2218	4317	4521	8629	7814	7003	6110	4913	6210	6563	5431	4720	3753	3913	3868	3274	8017	7167	7394	6383	5640	5051
																						8644	0.520824
																					BO	Cost		AVG on hand inventory
																				0.999	0	4142	0	7681	31814702	31814702	7681
																				0.97	1075	4142	4452650	6352	26309984	30762634	7427	1052068
																				0.95	1247	4142	5165074	6117	25336614	30501688	7364	260946
																				0.93	1376	4142	5699392	5943	24615906	30315298	7319	186390
																				0.91	1481	4142	6134302	5800	24023600	30157902	7281	157396
																									0
																								1329	1075
																					10803			235	1247
																					9406			174	1508
																					1397			143	1602
																					4322
																					6037834
																					1075
																					8644
																					9292300									(이익-원가)/이익
																								8644			4142
																				Service Level	Frequency	BO QTY	BO Cost	출하량	주문량	Revenue	TTL Cost	Profit
																				0.999	0	0	0	69698	69347	602469512	287235274	0.523237
																				0.97	3	1075	270000	69698	60816	602469512	252169872	0.58144
																				0.95	3	1247	270000	69698	60561	602469512	251113662	0.583193
																				0.93	3	1376	270000	69698	60373	602469512	250334966	0.584485
																				0.91	3	1481	270000	69698	60217	602469512	249688814	0.585558
																				Service Level	Profit
																				0.999	0.523237
																				0.97	0.58144
																				0.95	0.583193
																				0.93	0.584485
																				0.91	0.585558
[truncated: 11 more columns]

[truncated: 9 more sheets: Sheet4, Sheet6, Sheet7, Sheet8, Sheet9, Sheet10, Sheet11, Sheet12, Sheet13]
